# Supplementary material for: Targeting RANKL-independent osteoclastogenesis overcomes denosumab resistance in models of ER+ breast cancer bone metastasis
Source: JCI journal article supplement (doi:10.1172/jci199285), 2026-05-15

Full unedited blot for Figure 3A

---

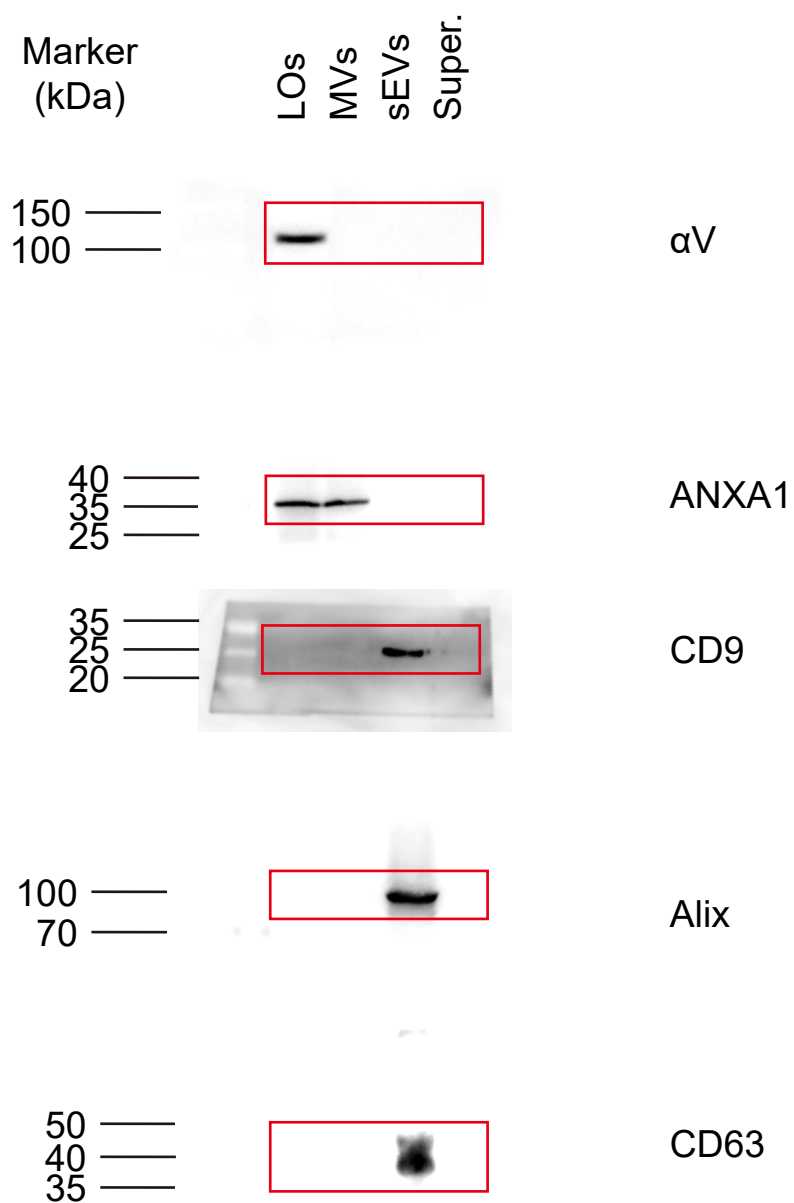

Full unedited blot for Figure 8D

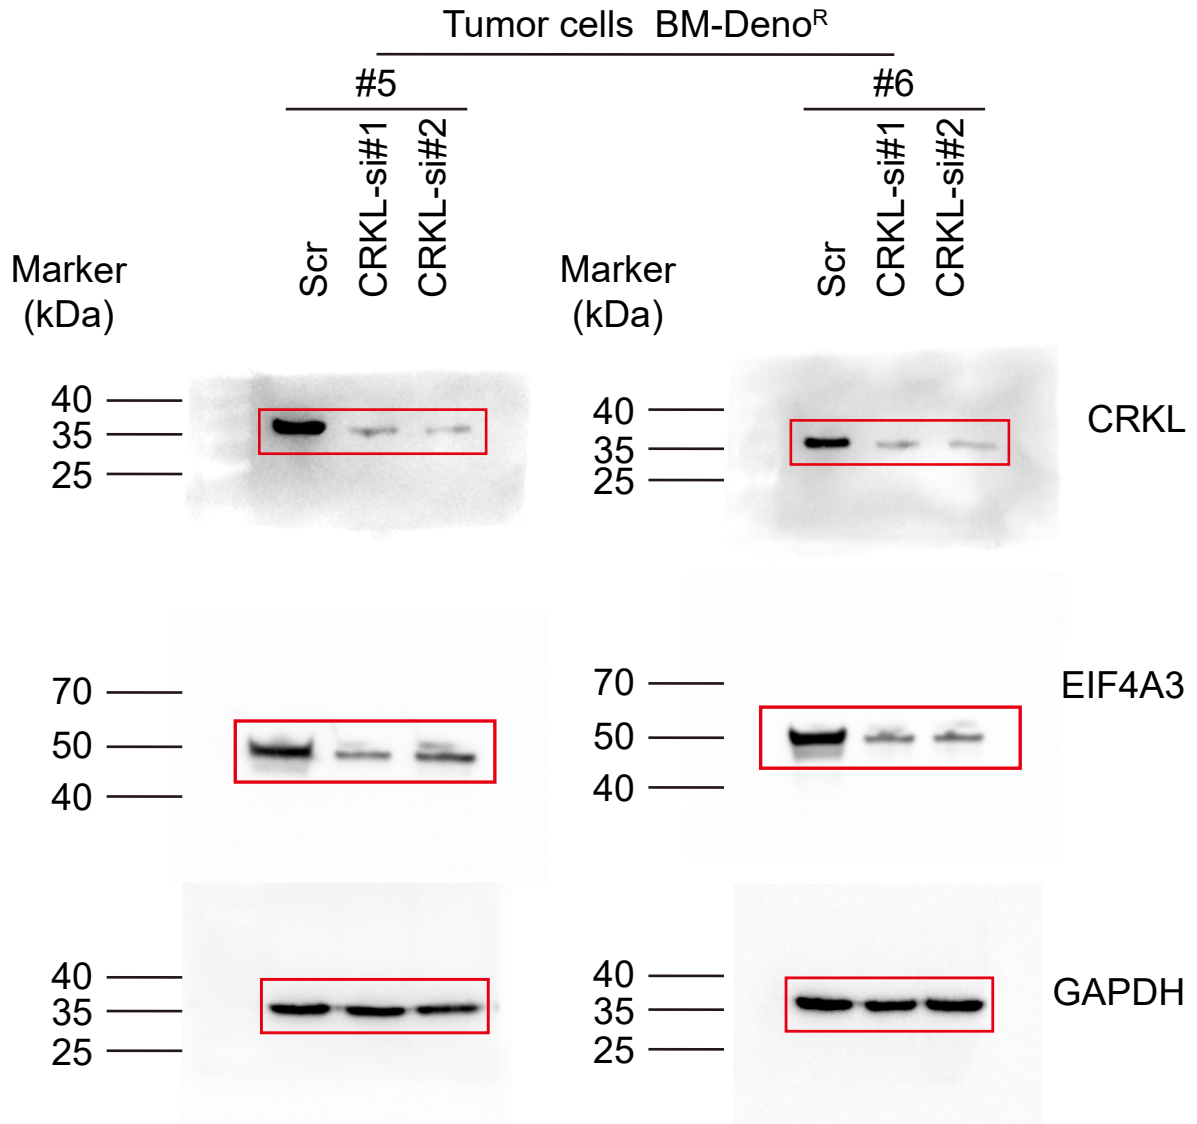

Full unedited blot for Figure 8E

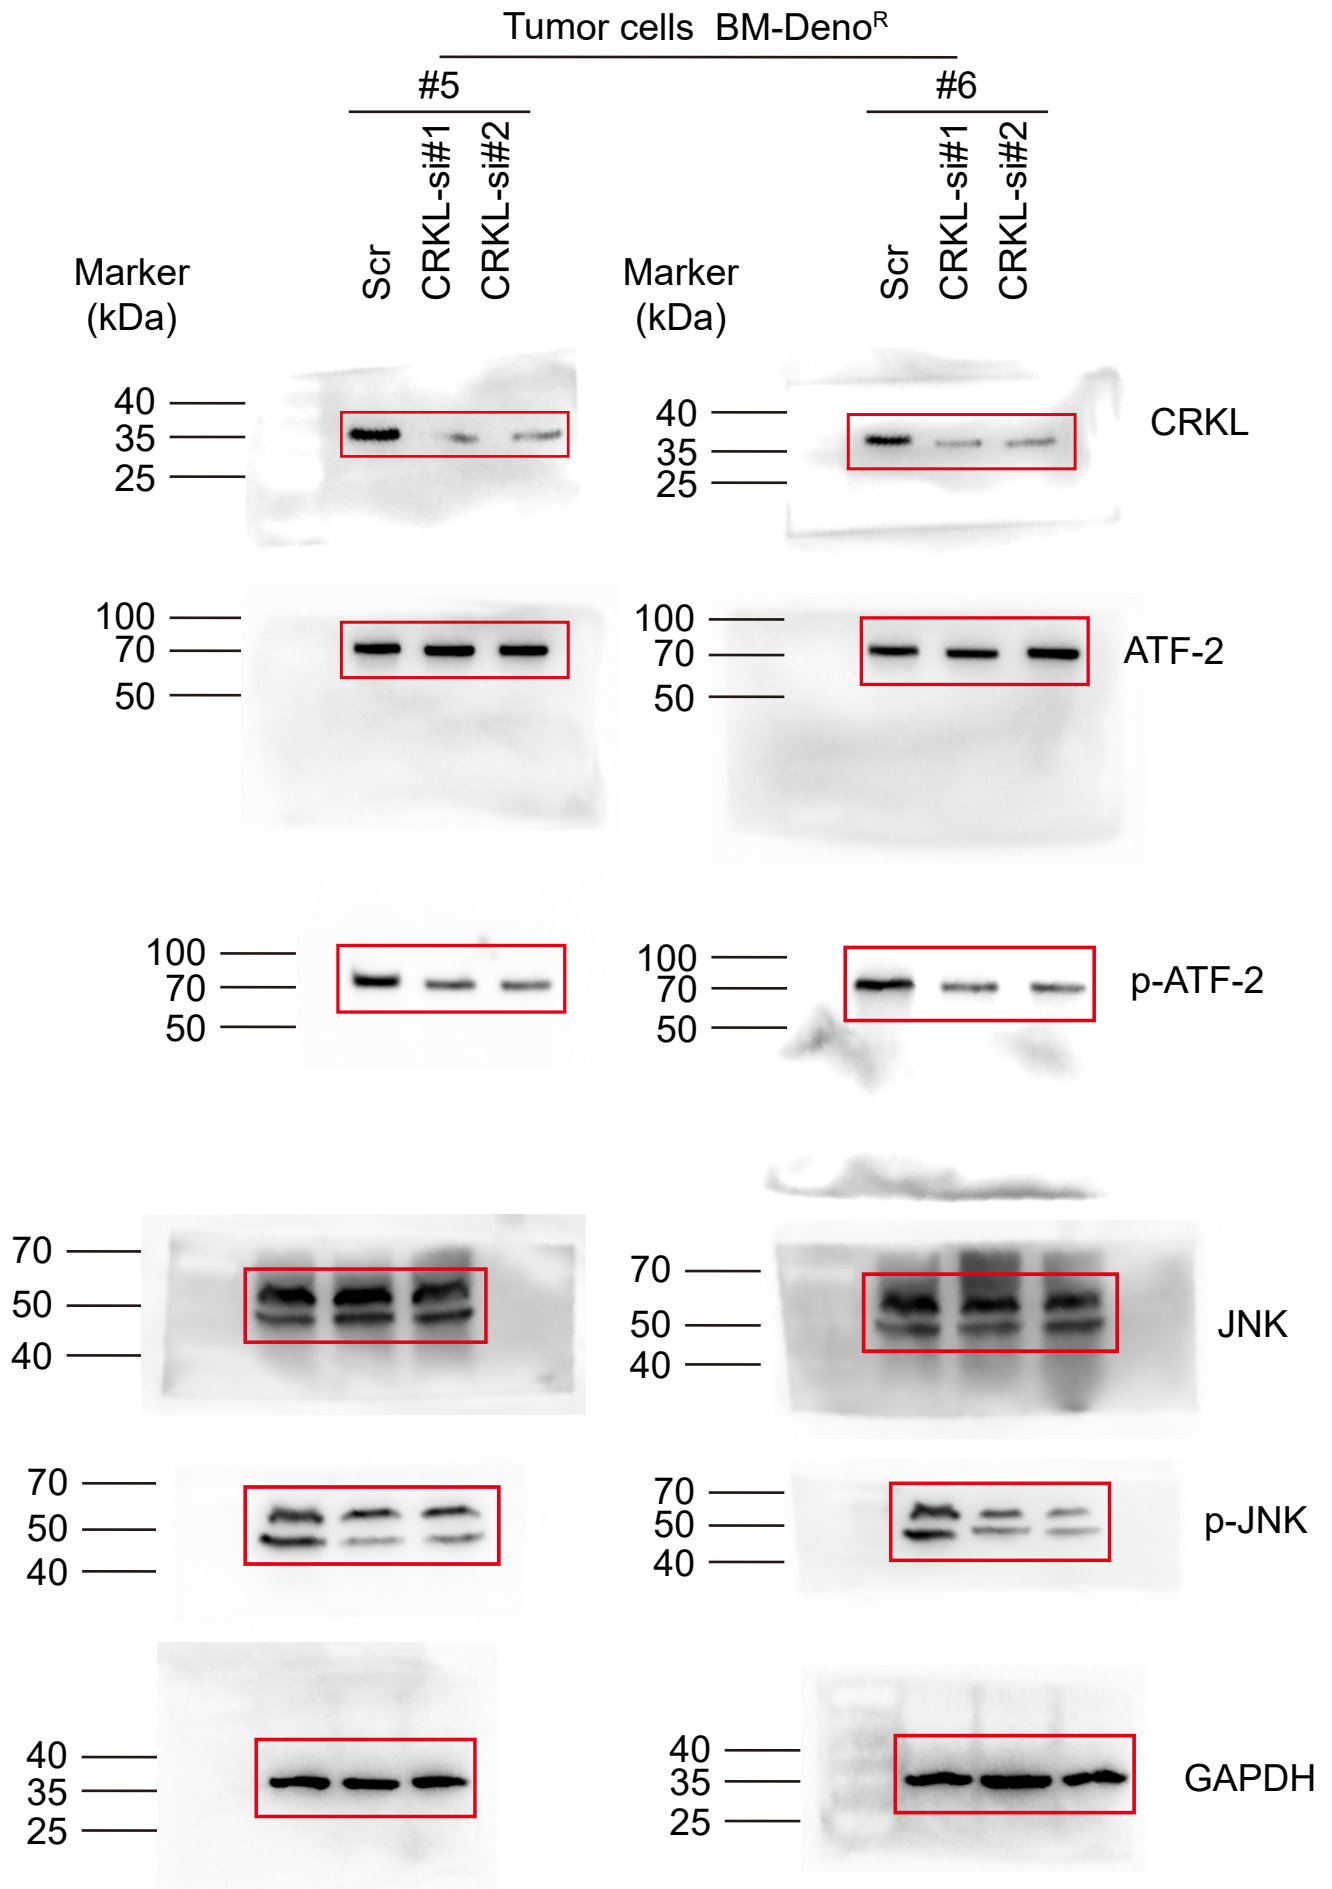

Full unedited blot for Figure 8F

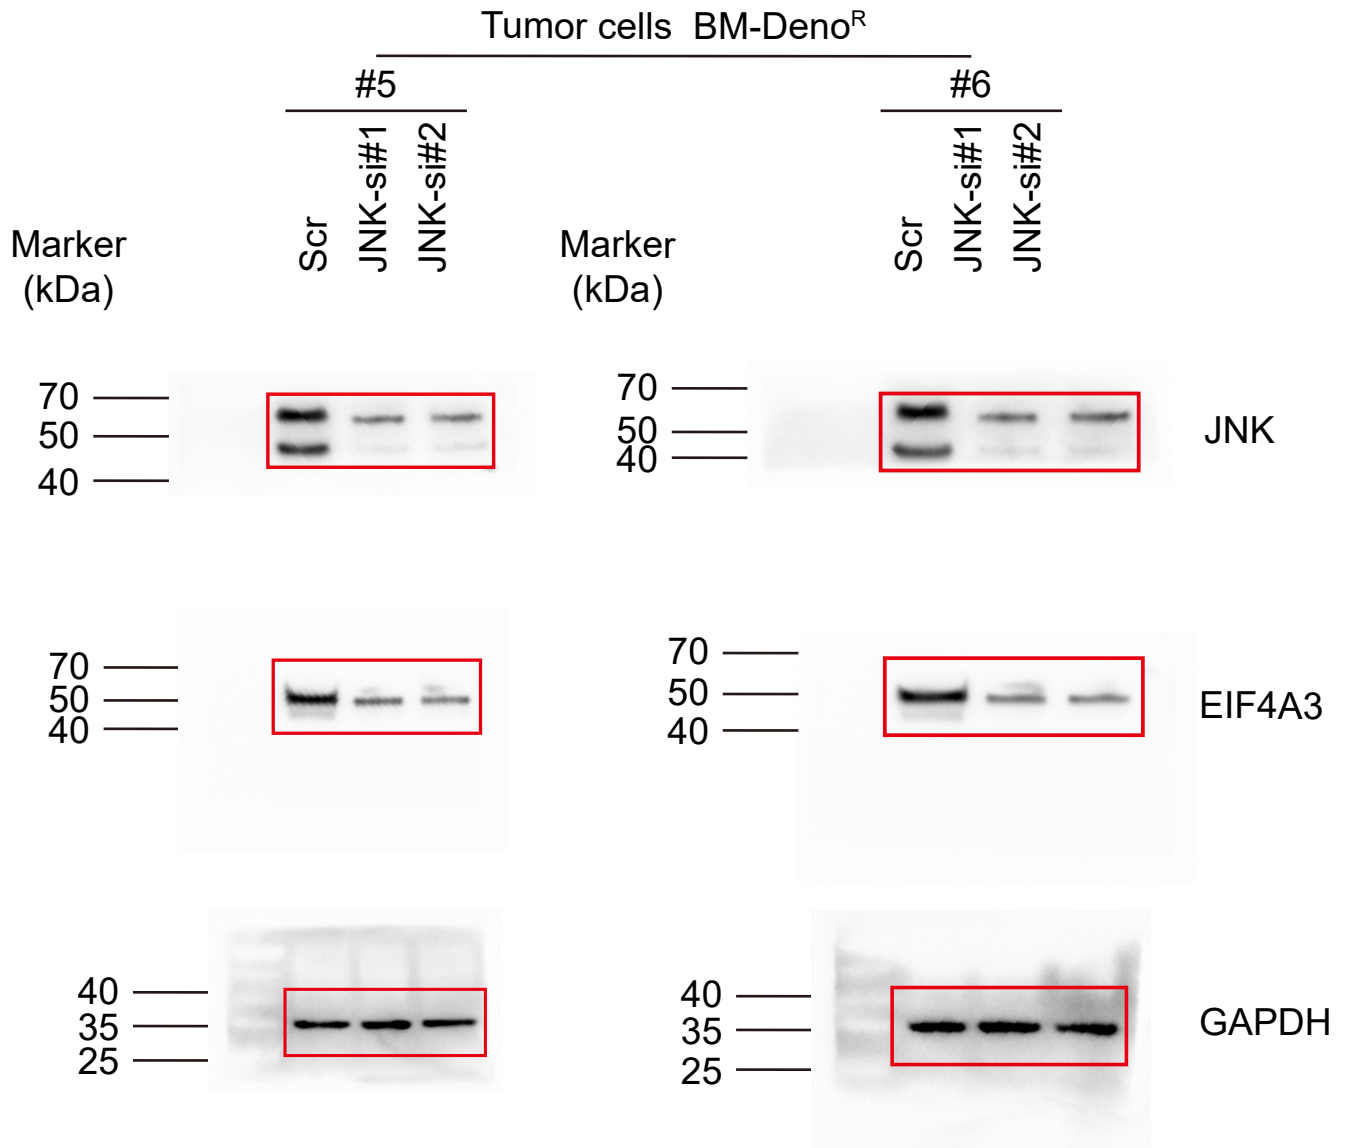

Full unedited blot for Figure 8G

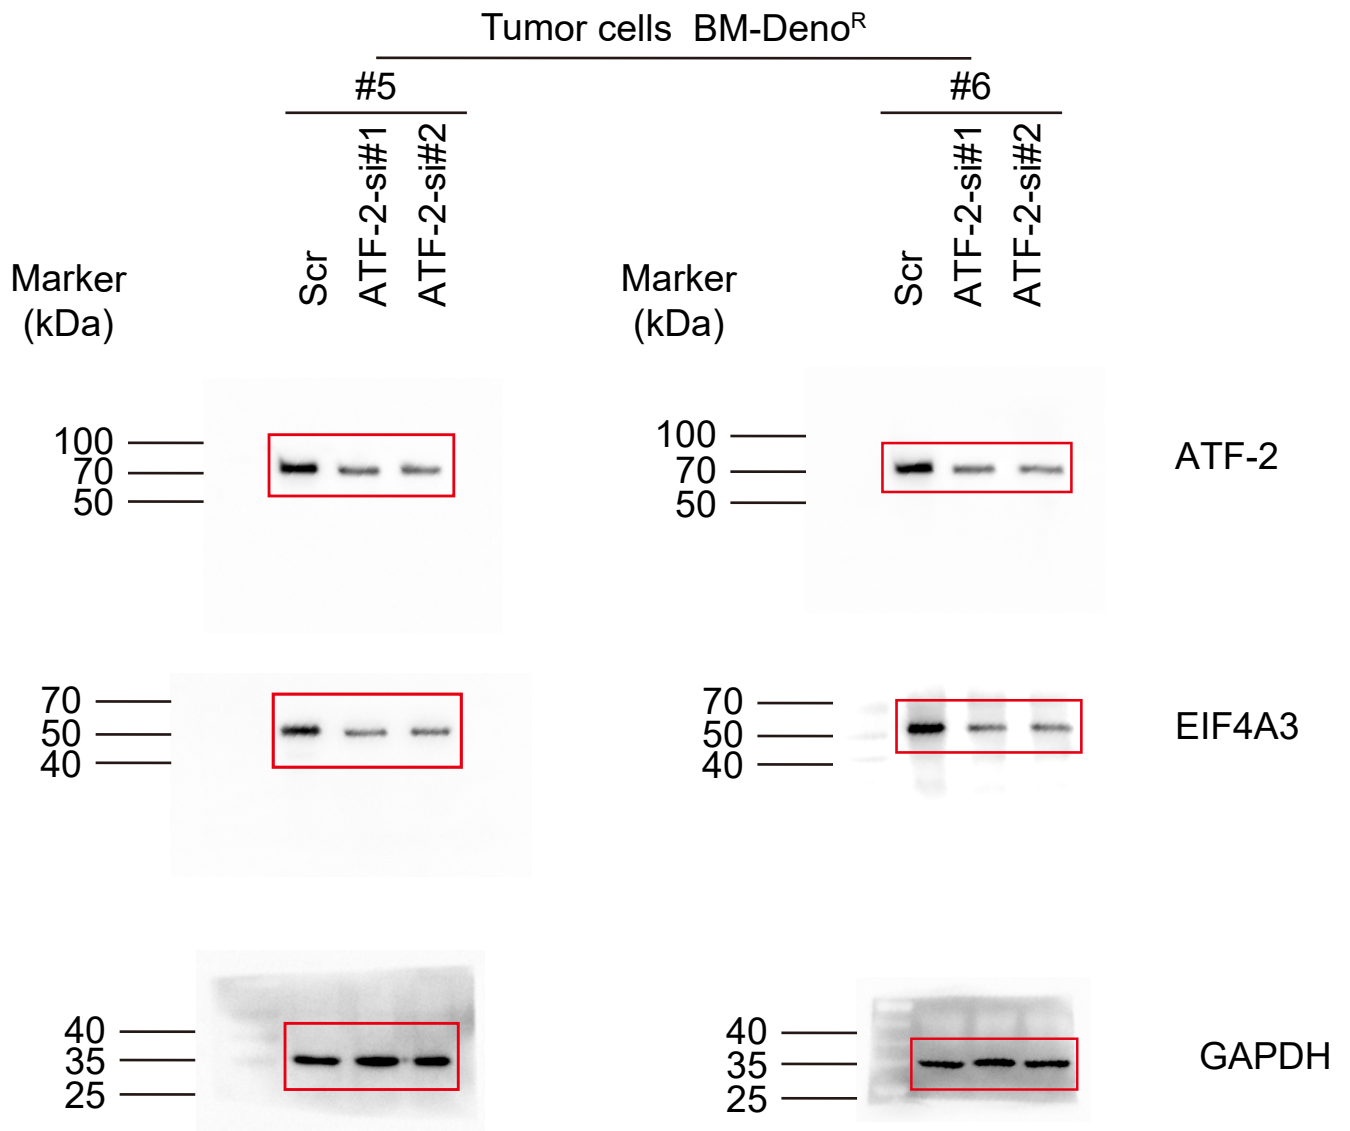

Full unedited blot for Figure 9B

---

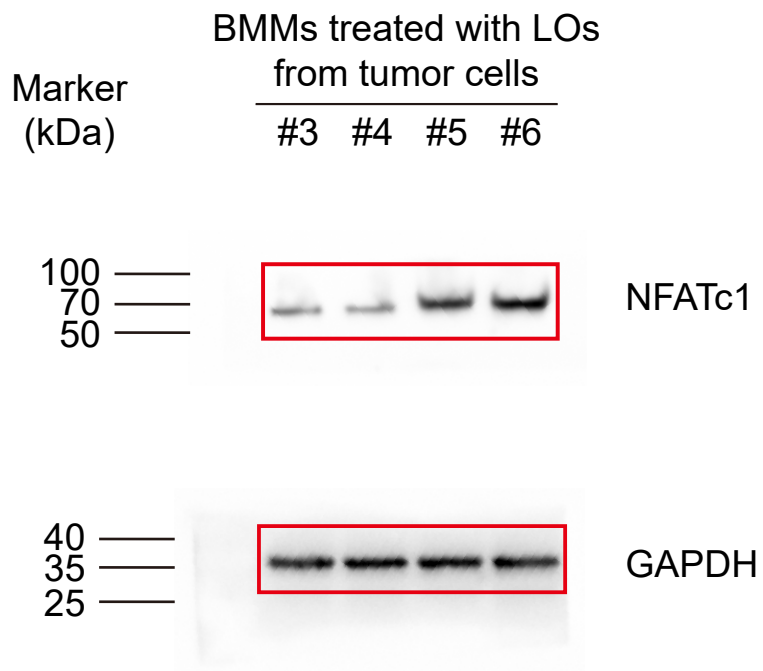

Full unedited blot for Figure 9H

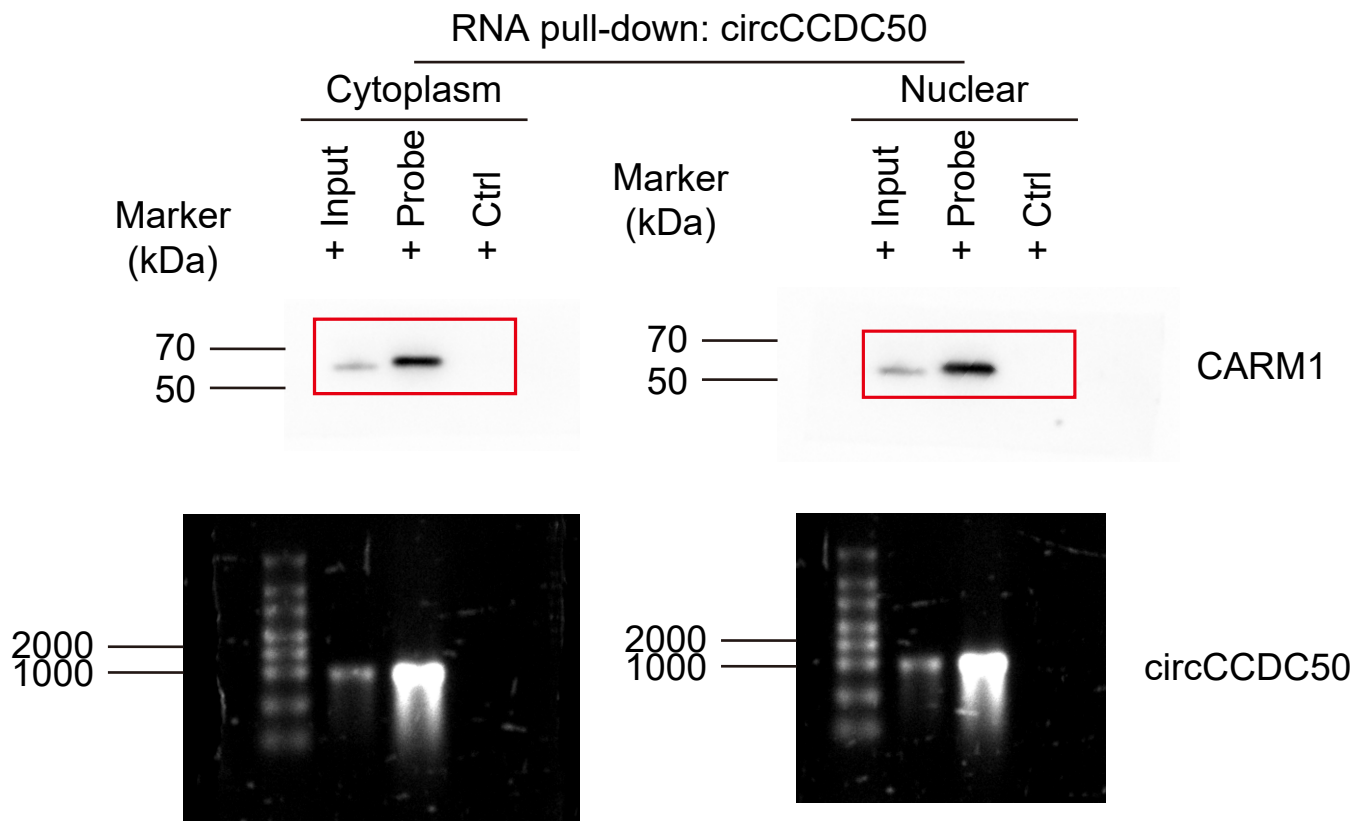

Full unedited blot for Figure 10D

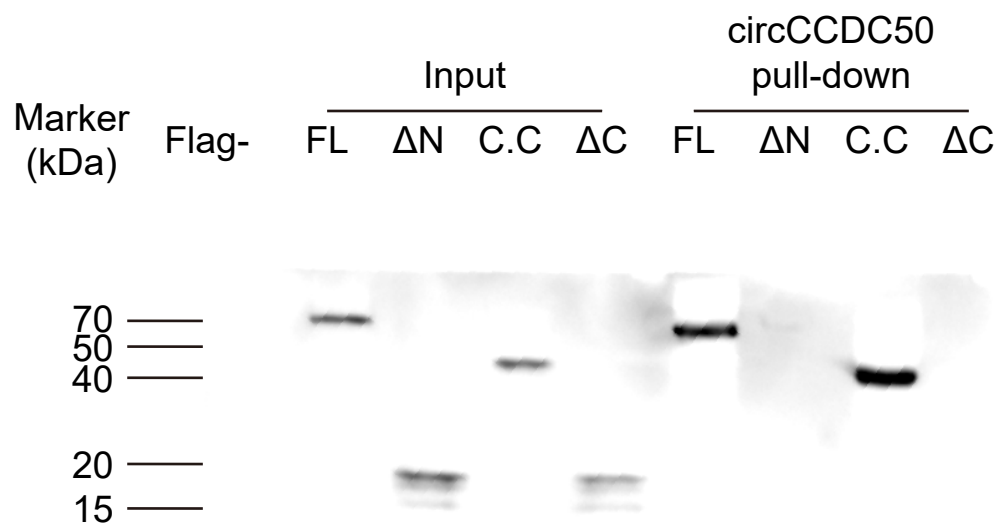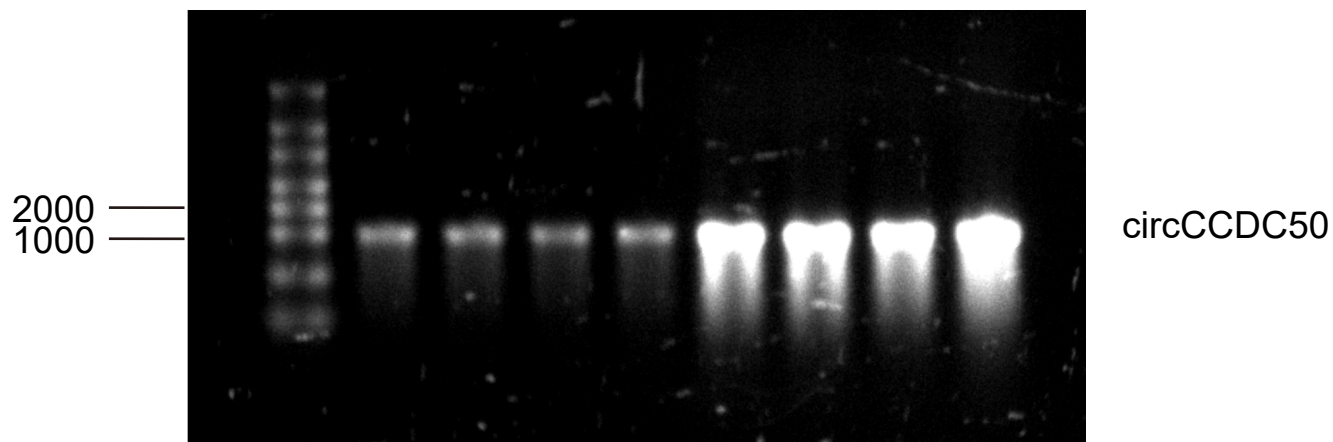



Full unedited blot for Supplementary Figure 6D

---

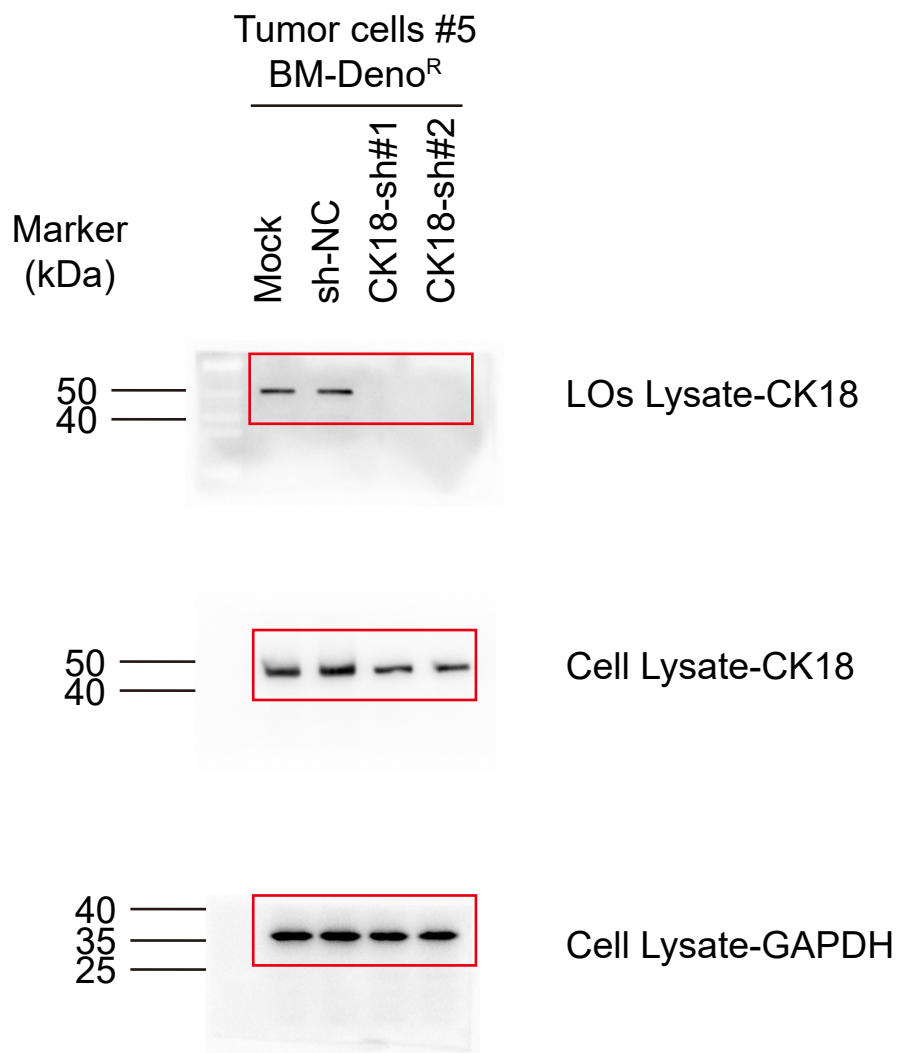

Full unedited blot for Supplementary Figure 6E

---

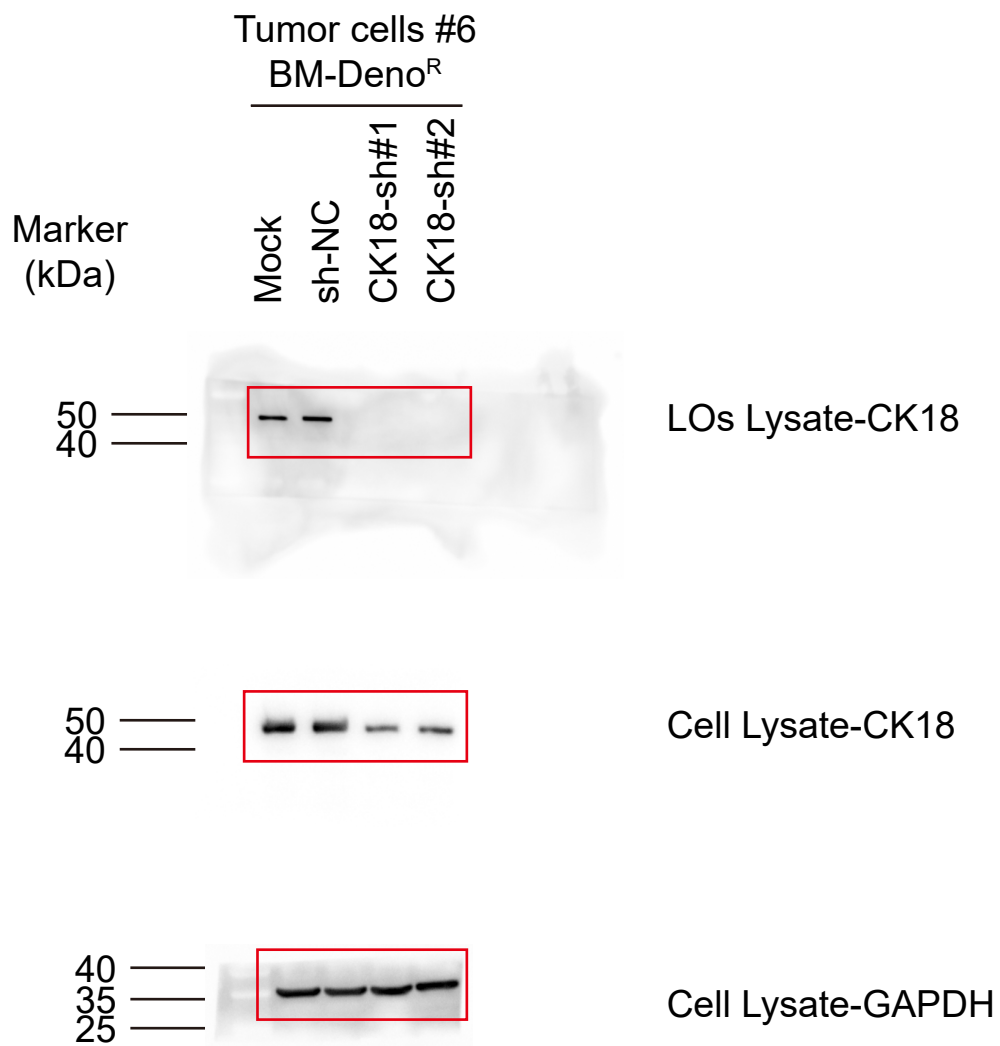

Full unedited blot for Supplementary Figure 8G

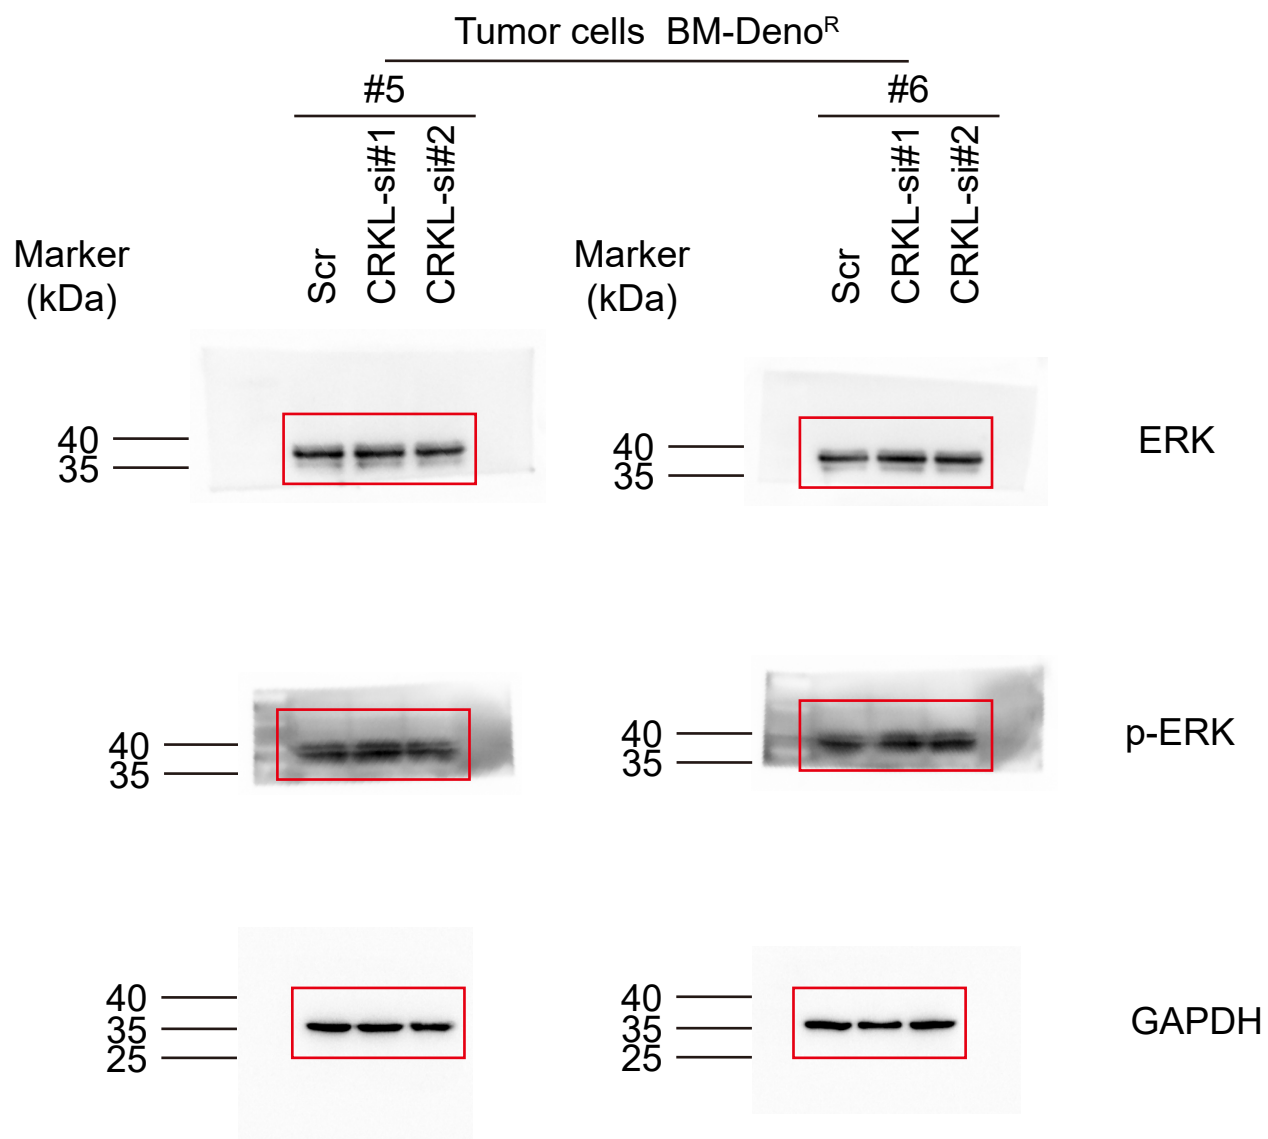

Full unedited blot for Supplementary Figure 8H

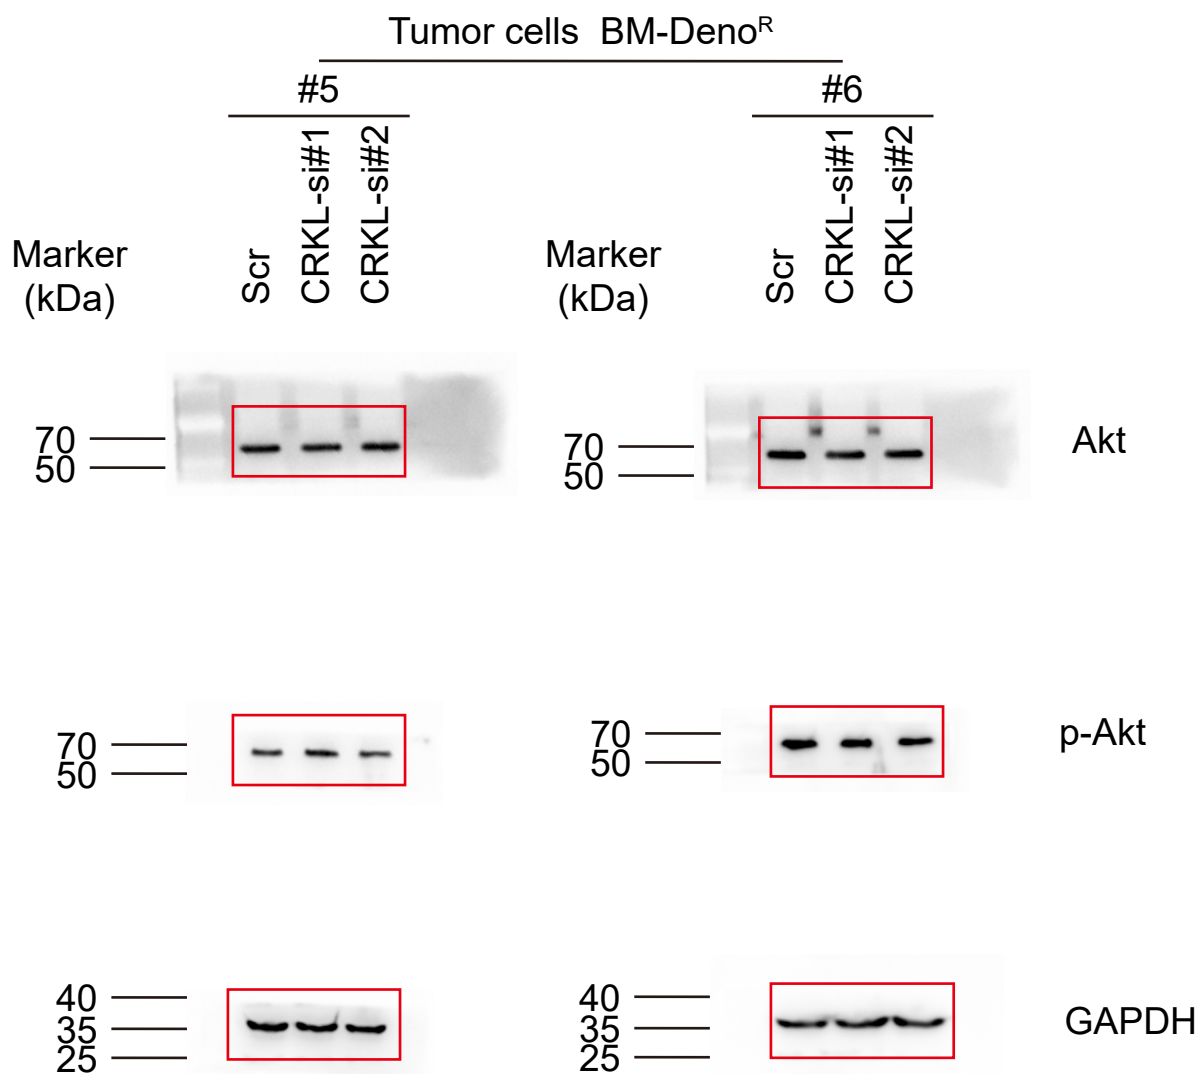

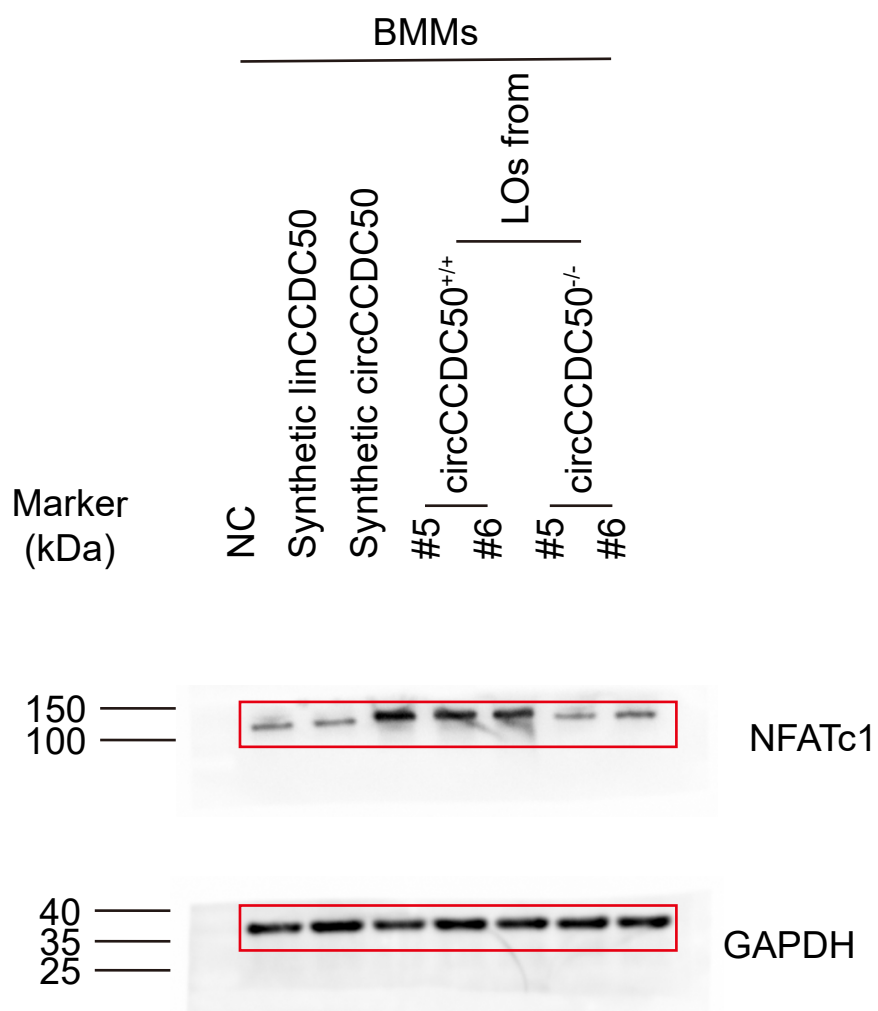

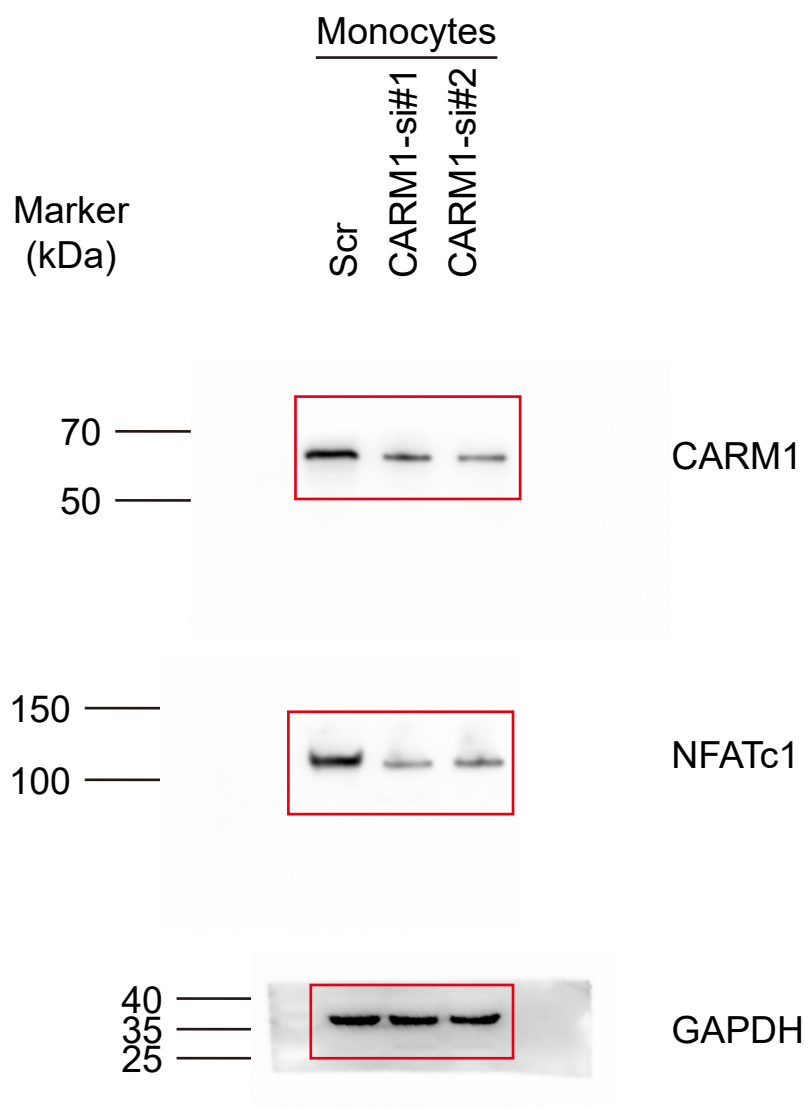

Full unedited blot for Supplementary Figure 10J

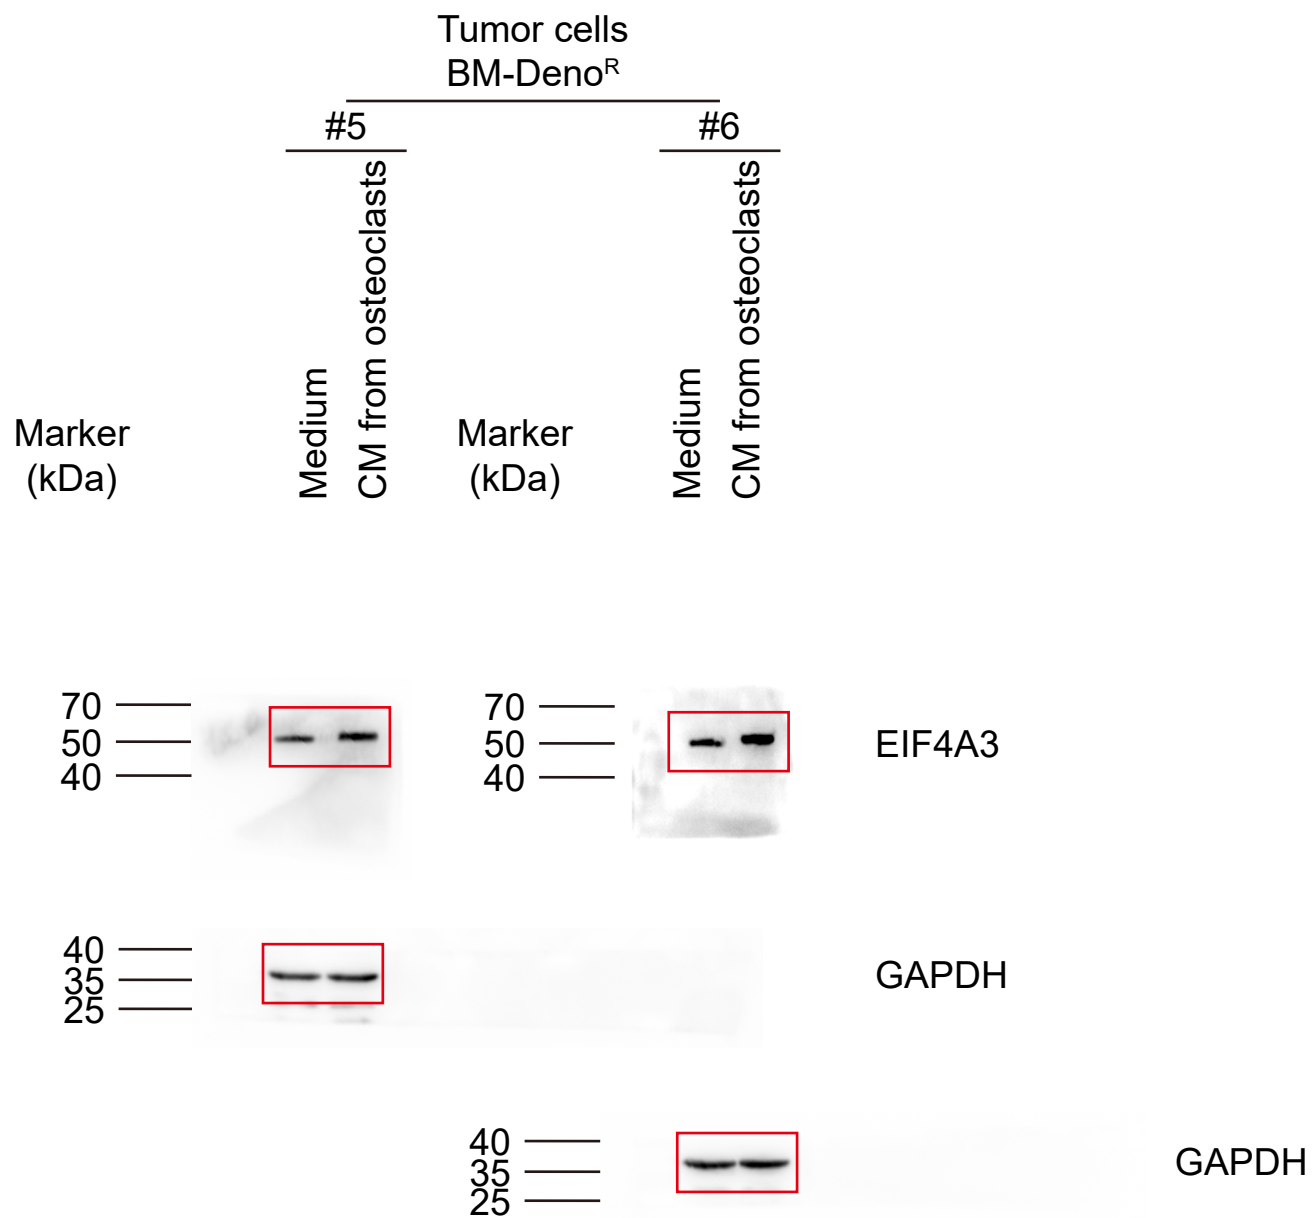

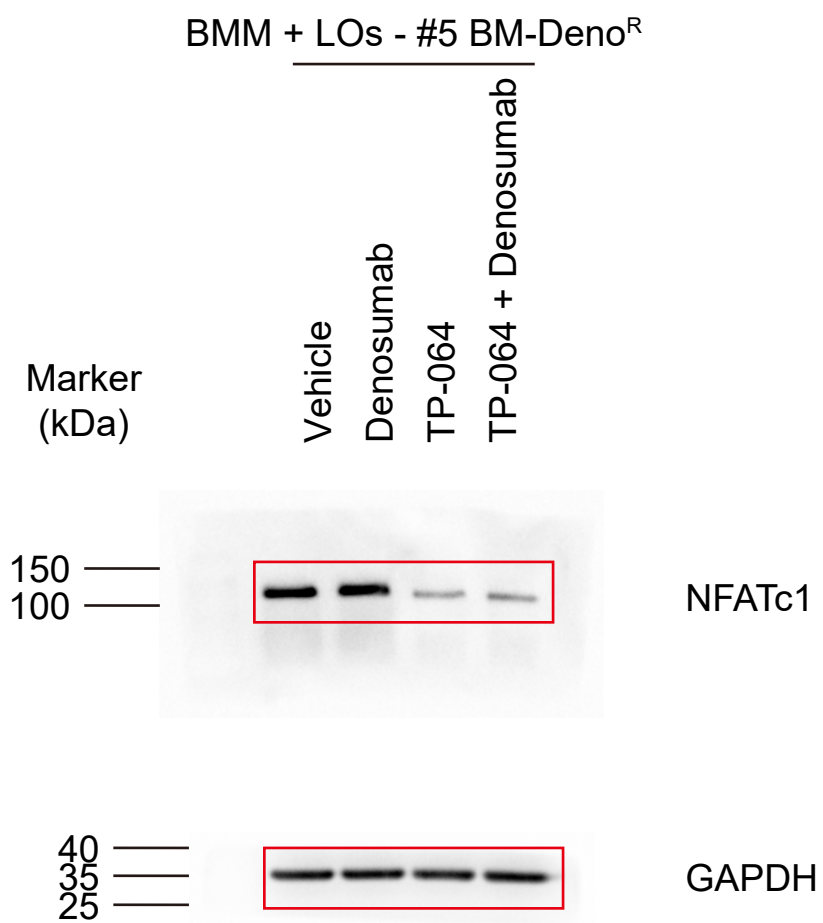

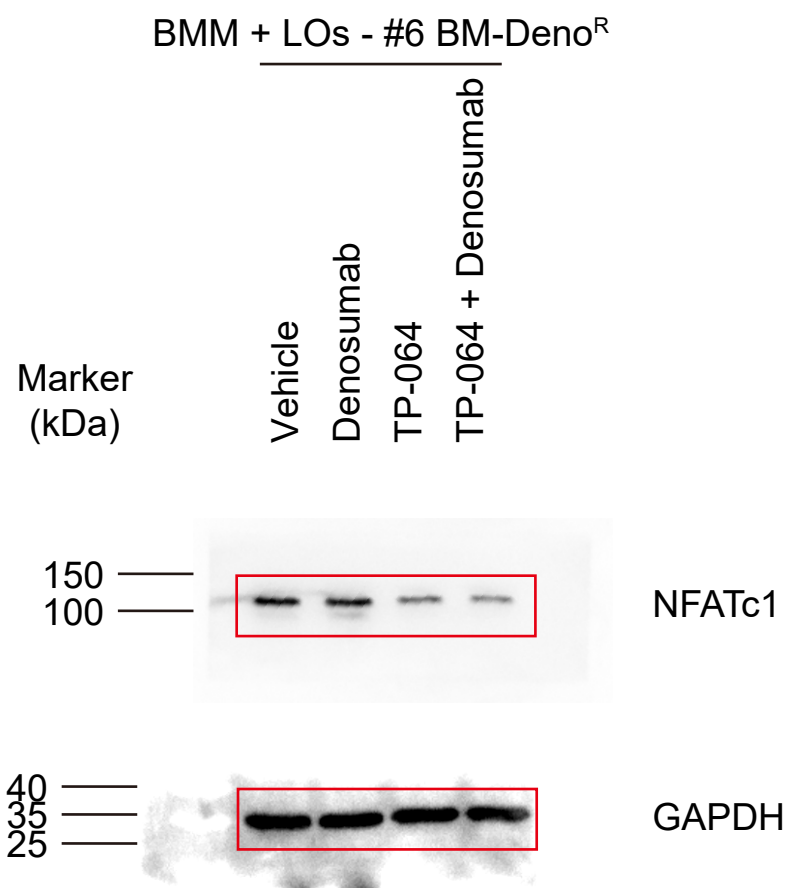

Supplement: sd2 [file 2]
